# Supplementary material
Source: MDPI journal article supplement (https://www.mdpi.com/2073-4433/13/8/1320)
Supplement: s1 [file s1]

# Supplementary Materials: Assessment and Characterization of Alkylated PAHs in Selected Sites across Canada

Andrzej Wnorowski \*, David Harnish, Ying Jiang, Valbona Celo, Ewa Dabek-Zlotorzynska and Jean-Pierre Charland

Analysis and Air Quality Section, Air Quality Research Division, Science and Technology Branch, Environment and Climate Change Canada, 335 River Road, Ottawa, ON K1A 0H3, Canada

\* Correspondence: andrzej.wnorowski@ec.gc.ca

## Table of Contents

|                                             |           |
|---------------------------------------------|-----------|
| Section S1: Standards and Chemicals         | S3        |
| Section S2: Additional Sampling Information | S3        |
| Section S3: GC-MS analysis                  | S4        |
| Section S4: Quality Control                 | S4        |
| Tables S1 – S9                              | S5 – S33  |
| Figures S1 – S3                             | S34 – S36 |
| References                                  | S37       |

## Section S1. Standards and Chemicals

The studied polycyclic aromatic hydrocarbons (PACs), their acronyms and properties are listed in Table S1. PACs targeted in this study include individually analyzed compounds and also determined as analyte groups C1 to C4 alkylated PAHs and DBTs because of their co-elution and the limited chromatographic selectivity for such large numbers of isomers. For example, BTCs comprise summed C1-C4 alkylated series of B[a]A, TRI, CHRY since these compounds co-elute during chromatographic analysis. Designations C1, C2, C3, and C4 refer to the number of carbons in the alkyl side chains for alk-PAHs and DBTs.

NIST Standard Reference Material SRM 1649b (Gaithersburg, MD, USA) was used as a control for evaluating the analytical accuracy of the PACs determined in ambient air. The deuterated surrogates used to estimate recoveries (*d*<sub>8</sub>-acenaphthylene, *d*<sub>10</sub>-acenaphthene, *d*<sub>10</sub>-fluorene, *d*<sub>10</sub>-phenanthrene, *d*<sub>10</sub>-anthracene, *d*<sub>10</sub>-pyrene, *d*<sub>12</sub>-benzo[a]anthracene, *d*<sub>12</sub>-triphenylene, *d*<sub>12</sub>-chrysene, *d*<sub>12</sub>-benzo[b]fluoranthene, *d*<sub>12</sub>-benzo[e]pyrene, *d*<sub>12</sub>-benzo[a]pyrene, *d*<sub>12</sub>-perylene, *d*<sub>12</sub>-indeno[1,2,3-cd]pyrene, *d*<sub>14</sub>-dibenz[a,h]anthracene, *d*<sub>12</sub>-benzo[ghi]perylene, and *d*<sub>10</sub>-fluoranthene as internal standards), with 99 % or greater purity, were obtained from CDN Isotopes (Pointe-Claire, QC, Canada) and CIL (Tewksbury, MA, USA).

## Section S2. Additional Sampling Information:

A high volume sampler built by Environment Canada (based on Tisch HiVol sampler) and used in the National Air Pollution Surveillance Program (NAPS) to routinely monitor ambient air quality was deployed at the monitoring study sites. The sampler was fitted with a TSP (PM<sub>30</sub> cut off) inlet. A teflon-coated borosilicate glass fiber filter (GFF) (PALL Life Sciences, PALLFLEX Membrane Filters EMFAB TX40HI20-WW, 20.32x25.40cm) was used to collect PM<sub>30</sub> associated PACs. Two PUF sorbent plugs (Sure-line Mfg. Inc., 8.26x7.62cm, open-cell grade 1545, pre-cleaned on accelerated solvent extractor (ASE) with dichloromethane/acetone followed by hexane, and dried under vacuum at 50°C) were used to collect volatiles from the GP filtered ambient air.

**Citation:** Wnorowski, A.; Harnish, D.; Jiang, Y.; Celo, V.; Dabek-Zlotorzynska, E.; Charland, J.-P. Assessment and Characterization of Alkylated PAHs in Selected Sites across Canada. *Atmosphere* **2022**, *13*, 1320. <https://doi.org/10.3390/atmos13081320>

Academic Editor(s): Célia Alves; Antonio Donato

Received: 22 July 2022

Accepted: 11 August 2022

Published: 18 August 2022

**Publisher's Note:** MDPI stays neutral with regard to jurisdictional claims in published maps and institutional affiliations.

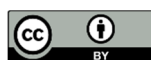

**Copyright:** © 2022 by the authors. Submitted for possible open access publication under the terms and conditions of the Creative Commons Attribution (CC BY) license (<https://creativecommons.org/licenses/by/4.0/>).

### Section S3. GC-MS analysis:

Instrumental and acquisition conditions were described elsewhere [1]. Briefly, analysis was carried out on an Agilent 6890GC interfaced directly to an Agilent 5973 MSD. A 1 µL cool on-column injection was set to track the GC oven temperature. The chromatographic separation was performed on a DB-XLB column (30m x0.25mm x0.25µm) with a helium flow of 2.0 mL/min. The initial temperature of the GC oven was 90°C and then, after 1 min, increased to 320°C at a rate 5°C/min and finally held for 10 min for a total run time of 77 min. A minimum of three ions were monitored for all native analytes, two characteristic ions for each of the surrogate analytes and one ion for the internal standard under Selected Ion Monitoring mode.

### Section S4. Quality Control:

For quality assurance and quality control, field and laboratory blank samples were prepared following the same procedures as for the samples. Before Soxhlet extraction, each sample (filter and PUF-pair) was spiked with 100 µL recovery surrogates at 10 ng/µL. Prior to GC-MS analysis, all samples were spiked with 100 µL of d<sub>10</sub>-fluoranthene. A laboratory control sample consisting of a blank filter spiked with surrogate compounds was processed along with each set of field samples. Chromatographic performance was verified daily by confirming chromatographic resolution of mid-level calibration standards that were run daily on GC-MS. All measured concentrations were recovery corrected [1]. Instrument detection limit (IDL) was established when response for characteristic ions exceeded the background noise level by a minimum ratio of 3:1. The analytical MDL was obtained by using data from seven replicate analyses of filter/PUF samples spiked at amounts of 0.02 µg of the standard solution. The standard deviation (SD) obtained from replicate analysis and the Student t-value were used to calculate analytical MDL at 95% confidence level for each analyte ( $t(n-1), 0.95 \times \text{SD}$ ). Summary of IDL, MDL and recovery are provided in Table S3.

**Table S1.** Properties and Characteristics of Studied Individual and Grouped PACs.

| Compound                  | Abbreviation | Formula                         | Molecular Weight [g/mol] | Number of Rings | Mp [°C] | Bp [°C] | Ps@25°C [Pa] <sup>1</sup> |
|---------------------------|--------------|---------------------------------|--------------------------|-----------------|---------|---------|---------------------------|
| Acenaphthylene            | AL           | C <sub>12</sub> H <sub>8</sub>  | 152                      | 3               | 92      | 280     | 4.15 x10 <sup>0</sup>     |
| Acenaphthene              | AE           | C <sub>12</sub> H <sub>10</sub> | 154                      | 3               | 93      | 279     | 1.36 x10 <sup>0</sup>     |
| Fluorene                  | FL           | C <sub>13</sub> H <sub>10</sub> | 166                      | 3               | 115     | 295     | 6.19 x10 <sup>-1</sup>    |
| Anthracene                | AN           | C <sub>14</sub> H <sub>10</sub> | 178                      | 3               | 215     | 340     | 6.59 x10 <sup>-2</sup>    |
| Phenanthrene              | PHE          | C <sub>14</sub> H <sub>10</sub> | 178                      | 3               | 100     | 340     | 8.75 x10 <sup>-2</sup>    |
| 2-Methylfluorene          | MFL          | C <sub>14</sub> H <sub>12</sub> | 180                      | 3               | 85      | 307     | 1.57 x10 <sup>-1</sup>    |
| Pyrene                    | PY           | C <sub>16</sub> H <sub>10</sub> | 202                      | 4               | 151     | 404     | 1.06 x10 <sup>-2</sup>    |
| Fluoranthene              | FLT          | C <sub>16</sub> H <sub>10</sub> | 202                      | 4               | 108     | 384     | 8.11 x10 <sup>-3</sup>    |
| Benzo[a]fluorene          | B[a]FL       | C <sub>17</sub> H <sub>12</sub> | 216                      | 4               | 100     | 339     | 3.19 x10 <sup>-2</sup>    |
| 1-Methylpyrene            | MPY          | C <sub>17</sub> H <sub>12</sub> | 216                      | 4               | 132     | 383     | 2.79 x10 <sup>-3</sup>    |
| Benzo[b]fluorene          | B[b]FL       | C <sub>17</sub> H <sub>12</sub> | 216                      | 4               | 121     | 370     | 5.19 x10 <sup>-4</sup>    |
| Benzo[g,h,i]fluoranthene  | B[ghi]FL     | C <sub>18</sub> H <sub>10</sub> | 226                      | 5               | 153     | 415     | 4.67 x10 <sup>-4</sup>    |
| Benz[a]anthracene         | B[a]A        | C <sub>18</sub> H <sub>12</sub> | 228                      | 4               | 158     | 438     | 1.07 x10 <sup>-4</sup>    |
| Triphenylene              | TRI          | C <sub>18</sub> H <sub>12</sub> | 228                      | 4               | 199     | 425     | 1.47 x10 <sup>-4</sup>    |
| Chrysene                  | CHRY         | C <sub>18</sub> H <sub>12</sub> | 228                      | 4               | 253     | 448     | 1.68 x10 <sup>-4</sup>    |
| Retene                    | RET          | C <sub>18</sub> H <sub>18</sub> | 234                      | 3               | 101     | 390     | 1.93 x10 <sup>-3</sup>    |
| 7-Methylbenz[a]anthracene | MB[a]A       | C <sub>19</sub> H <sub>14</sub> | 242                      | 4               | 148     | 410     | 6.05 x10 <sup>-4</sup>    |
| Benzo[b]fluoranthene      | B[b]FLT      | C <sub>20</sub> H <sub>12</sub> | 252                      | 5               | 168     | 443     | 1.73 x10 <sup>-3</sup>    |
| Perylene                  | PER          | C <sub>20</sub> H <sub>12</sub> | 252                      | 5               | 274     | 443     | 2.03 x10 <sup>-4</sup>    |

| Compound                           | Abbreviation | Formula                         | Molecular Weight [g/mol] | Number of Rings | Mp [°C] | Bp [°C] | Ps@25°C [Pa] <sup>1</sup> |
|------------------------------------|--------------|---------------------------------|--------------------------|-----------------|---------|---------|---------------------------|
| Benzo[k]fluoranthene               | B[k]FLT      | C <sub>20</sub> H <sub>12</sub> | 252                      | 5               | 217     | 480     | 1.02 x10 <sup>-5</sup>    |
| Benzo[e]pyrene                     | B[e]P        | C <sub>20</sub> H <sub>12</sub> | 252                      | 5               | 177     | 312     | 2.45 x10 <sup>-5</sup>    |
| Benzo[a]pyrene                     | B[a]P        | C <sub>20</sub> H <sub>12</sub> | 252                      | 5               | 176     | 495     | 3.99 x10 <sup>-5</sup>    |
| 3-Methylcholanthrene               | MCH          | C <sub>21</sub> H <sub>16</sub> | 268                      | 5               | 180     | 280     | 1.96 x10 <sup>-4</sup>    |
| Indeno[1,2,3-cd]fluoranthene       | IF           | C <sub>22</sub> H <sub>12</sub> | 276                      | 6               | 160     | 401     | 2.53 x10 <sup>-3</sup>    |
| Anthanthrene                       | ANT          | C <sub>22</sub> H <sub>12</sub> | 276                      | 6               | 162     | 405     | 8.32 x10 <sup>-4</sup>    |
| Indeno[1,2,3-cd]pyrene             | IP           | C <sub>22</sub> H <sub>12</sub> | 276                      | 6               | 161     | 404     | 8.80 x10 <sup>-4</sup>    |
| Benzo[g,h,i]perylene               | B[ghi]P      | C <sub>22</sub> H <sub>12</sub> | 276                      | 6               | 200     | 486     | 8.11 x10 <sup>-6</sup>    |
| Benzo[b]chrysene                   | B[b]C        | C <sub>22</sub> H <sub>14</sub> | 278                      | 5               | 269     | 524     | 3.33 x10 <sup>-5</sup>    |
| Dibenz[a,h]anthracene              | D[ah]A       | C <sub>22</sub> H <sub>14</sub> | 278                      | 5               | 269     | 524     | 3.33 x10 <sup>-5</sup>    |
| <b>C1-C4 NAP:</b>                  |              |                                 |                          |                 |         |         |                           |
| Naphthalene, 2-methyl-             | 2M-NAP       | C <sub>11</sub> H <sub>10</sub> | 142                      | 2               | 34      | 241     | 9.08 x10 <sup>0</sup>     |
| Naphthalene, 1-methyl-             | 1M-NAP       | C <sub>11</sub> H <sub>10</sub> | 142                      | 2               | 34      | 240     | 11.00 x10 <sup>0</sup>    |
| Naphthalene, 2-ethyl-              | 2E-NAP       | C <sub>12</sub> H <sub>12</sub> | 156                      | 2               | -7      | 258     | 4.21 x10 <sup>0</sup>     |
| Naphthalene, 1-ethyl-              | 1E-NAP       | C <sub>12</sub> H <sub>12</sub> | 156                      | 2               | -14     | 259     | 6.96 x10 <sup>0</sup>     |
| Naphthalene, 2,6-dimethyl-         | 26dM-NAP     | C <sub>12</sub> H <sub>12</sub> | 156                      | 2               | 97      | 265     | 3.91 x10 <sup>0</sup>     |
| Naphthalene, 2,7-dimethyl-         | 27dM-NAP     | C <sub>12</sub> H <sub>12</sub> | 156                      | 2               | 97      | 265     | 3.91 x10 <sup>0</sup>     |
| Naphthalene, 1,7-dimethyl-         | 17dM-NAP     | C <sub>12</sub> H <sub>12</sub> | 156                      | 2               | -17     | 264     | 1.95 x10 <sup>0</sup>     |
| Naphthalene, 1,3-dimethyl-         | 13dM-NAP     | C <sub>12</sub> H <sub>12</sub> | 156                      | 2               | -6      | 263     | 3.09 x10 <sup>0</sup>     |
| Naphthalene, 1,6-dimethyl-         | 16dM-NAP     | C <sub>12</sub> H <sub>12</sub> | 156                      | 2               | -17     | 264     | 1.95 x10 <sup>0</sup>     |
| Naphthalene, 1,4-dimethyl-         | 14dM-NAP     | C <sub>12</sub> H <sub>12</sub> | 156                      | 2               | 8       | 268     | 2.85 x10 <sup>0</sup>     |
| Naphthalene, 1,5-dimethyl-         | 15dM-NAP     | C <sub>12</sub> H <sub>12</sub> | 156                      | 2               | 82      | 265     | 2.44 x10 <sup>0</sup>     |
| Naphthalene, 2,3-dimethyl-         | 23dM-NAP     | C <sub>12</sub> H <sub>12</sub> | 156                      | 2               | 105     | 268     | 9.07 x10 <sup>-1</sup>    |
| Naphthalene, 1,2-dimethyl-         | 12dM-NAP     | C <sub>12</sub> H <sub>12</sub> | 156                      | 2               | 2       | 265     | 1.69 x10 <sup>0</sup>     |
| Naphthalene, 1,8-dimethyl-         | 18dM-NAP     | C <sub>12</sub> H <sub>12</sub> | 156                      | 2               | 82      | 265     | 2.44 x10 <sup>0</sup>     |
| Naphthalene, 2-ethyl-6-methyl-     | 2E6M-NAP     | C <sub>13</sub> H <sub>14</sub> | 170                      | 2               | 49      | 283     | 6.45 x10 <sup>-1</sup>    |
| Naphthalene, 1,2,6-trimethyl-      | 126tM-NAP    | C <sub>13</sub> H <sub>14</sub> | 170                      | 2               | 56      | 283     | 6.45 x10 <sup>-1</sup>    |
| Naphthalene, 7-isopropyl-1-methyl- | 7IP1M-NAP    | C <sub>14</sub> H <sub>16</sub> | 184                      | 2               | 49      | 289     | 4.67 x10 <sup>-1</sup>    |
| Naphthalene, 1,2,5,6-tetramethyl-  | 1256teM-NAP  | C <sub>14</sub> H <sub>16</sub> | 184                      | 2               | 72      | 298     | 2.88 x10 <sup>-1</sup>    |
| <b>C1-C4 FL:</b>                   |              |                                 |                          |                 |         |         |                           |
| Fluorene, 9-methyl-                | 9M-FL        | C <sub>14</sub> H <sub>12</sub> | 180                      | 3               | 46      | 155     | 2.21 x10 <sup>-1</sup>    |
| Fluorene, 3-methyl-                | 3M-FL        | C <sub>14</sub> H <sub>12</sub> | 180                      | 3               | 80      | 307     | 1.77 x10 <sup>-1</sup>    |
| Fluorene, 2-methyl-                | 2M-FL        | C <sub>14</sub> H <sub>12</sub> | 180                      | 3               | 80      | 307     | 1.77 x10 <sup>-1</sup>    |
| Fluorene, 1-methyl-                | 1M-FL        | C <sub>14</sub> H <sub>12</sub> | 180                      | 3               | 85      | 307     | 1.57 x10 <sup>-1</sup>    |
| Fluorene, 4-methyl-                | 4M-FL        | C <sub>14</sub> H <sub>12</sub> | 180                      | 3               | 80      | 307     | 1.77 x10 <sup>-1</sup>    |
| Fluorene, 9-ethyl-                 | 9E-FL        | C <sub>15</sub> H <sub>14</sub> | 194                      | 3               | 80      | 123     | 1.04 x10 <sup>-1</sup>    |

| Compound                           | Abbreviation | Formula                           | Molecular Weight [g/mol] | Number of Rings | Mp [°C] | Bp [°C] | Ps@25°C [Pa] <sup>1</sup> |
|------------------------------------|--------------|-----------------------------------|--------------------------|-----------------|---------|---------|---------------------------|
| Fluorene, 1,7-dimethyl-            | 17dM-FL      | C <sub>15</sub> H <sub>14</sub>   | 194                      | 3               | NA      | NA      | NA                        |
| Fluorene, 9-n-propyl-              | 9P-FL        | C <sub>16</sub> H <sub>16</sub>   | 208                      | 3               | 89      | 330     | 5.13 x10 <sup>-2</sup>    |
| Fluorene, 9-n-butyl-               | 9B-FL        | C <sub>17</sub> H <sub>18</sub>   | 222                      | 3               | 99      | 343     | 2.65 x10 <sup>-2</sup>    |
| <b>DBT:</b>                        |              |                                   |                          |                 |         |         |                           |
| Dibenzothiophene                   | DBT          | C <sub>12</sub> H <sub>8</sub> S  | 184                      | 3               | 93      | 318     | 1.01 x10 <sup>-1</sup>    |
| <b>C1-C4 DBT:</b>                  |              |                                   |                          |                 |         |         |                           |
| Dibenzothiophene, 4-methyl-        | 4M-DBT       | C <sub>13</sub> H <sub>10</sub> S | 198                      | 3               | 100     | 331     | 4.97 x10 <sup>-2</sup>    |
| Dibenzothiophene, 2-methyl-        | 2M-DBT       | C <sub>13</sub> H <sub>10</sub> S | 198                      | 3               | 100     | 331     | 4.97 x10 <sup>-2</sup>    |
| Dibenzothiophene, 3-methyl-        | 3M-DBT       | C <sub>13</sub> H <sub>10</sub> S | 198                      | 3               | 100     | 331     | 4.97 x10 <sup>-2</sup>    |
| Dibenzothiophene, 1-methyl-        | 1M-DBT       | C <sub>13</sub> H <sub>10</sub> S | 198                      | 3               | 100     | 331     | 4.97 x10 <sup>-2</sup>    |
| Dibenzothiophene, 4,6-dimethyl-    | 46dM-DBT     | C <sub>14</sub> H <sub>12</sub> S | 212                      | 3               | 111     | 343     | 2.57 x10 <sup>-3</sup>    |
| Dibenzothiophene, 2,6-dimethyl-    | 26dM-DBT     | C <sub>14</sub> H <sub>12</sub> S | 212                      | 3               | 111     | 343     | 2.57 x10 <sup>-3</sup>    |
| Dibenzothiophene, 2,8-dimethyl-    | 28dM-DBT     | C <sub>14</sub> H <sub>12</sub> S | 212                      | 3               | 117     | 357     | 1.19 x10 <sup>-2</sup>    |
| Dibenzothiophene, 1,8-dimethyl-    | 18dM-DBT     | C <sub>14</sub> H <sub>12</sub> S | 212                      | 3               | 111     | 343     | 2.57 x10 <sup>-3</sup>    |
| Dibenzothiophene, 2,3-dimethyl-    | 23dM-DBT     | C <sub>14</sub> H <sub>12</sub> S | 212                      | 3               | 111     | 343     | 2.57 x10 <sup>-3</sup>    |
| Dibenzothiophene, 2,4,7-trimethyl- | 247tM-DBT    | C <sub>15</sub> H <sub>14</sub> S | 226                      | 3               | 122     | 355     | 1.36 x10 <sup>-2</sup>    |
| Dibenzothiophene, 2,3,7-trimethyl- | 237tM-DBT    | C <sub>15</sub> H <sub>14</sub> S | 226                      | 3               | NA      | NA      | NA                        |
| Dibenzothiophene, 2,3,8-trimethyl- | 238tM-DBT    | C <sub>15</sub> H <sub>14</sub> S | 226                      | 3               | NA      | NA      | NA                        |
| Dibenzothiophene, 4,6-diethyl-     | 46dE-DBT     | C <sub>16</sub> H <sub>16</sub> S | 240                      | 3               | 127     | 366     | 7.19 x10 <sup>-3</sup>    |
| Dibenzothiophene, 2-n-butyl-       | 2B-DBT       | C <sub>16</sub> H <sub>16</sub> S | 240                      | 3               | NA      | NA      | NA                        |
| <b>C1-C4 PHE/AN:</b>               |              |                                   |                          |                 |         |         |                           |
| Phenanthrene, 3-methyl-            | 3M-PHE       | C <sub>15</sub> H <sub>12</sub>   | 192                      | 3               | 58      | 157     | 1.76 x10 <sup>-2</sup>    |
| Phenanthrene, 2-methyl-            | 2M-PHE       | C <sub>15</sub> H <sub>12</sub>   | 192                      | 3               | 58      | 157     | 1.76 x10 <sup>-2</sup>    |
| Anthracene, 2-methyl-              | 2M-AN        | C <sub>15</sub> H <sub>12</sub>   | 192                      | 3               | 209     | 340     | 4.71 x10 <sup>-2</sup>    |
| Phenanthrene, 4-methyl-            | 4M-PHE       | C <sub>15</sub> H <sub>12</sub>   | 192                      | 3               | 123     | 340     | 1.87 x10 <sup>-2</sup>    |
| Phenanthrene, 9-methyl             | 9M-PHE       | C <sub>15</sub> H <sub>12</sub>   | 192                      | 3               | 94      | 340     | 3.08 x10 <sup>-2</sup>    |
| Anthracene, 1-methyl               | 1M-AN        | C <sub>15</sub> H <sub>12</sub>   | 192                      | 3               | 86      | 200     | NA                        |
| Phenanthrene, 1-methyl-            | 1M-PHE       | C <sub>15</sub> H <sub>12</sub>   | 192                      | 3               | 123     | 340     | 1.87 x10 <sup>-2</sup>    |
| Anthracene, 9-methyl-              | 9M-AN        | C <sub>15</sub> H <sub>12</sub>   | 192                      | 3               | 82      | 196     | 1.93 x10 <sup>-2</sup>    |
| Phenanthrene, 2,7-dimethyl-        | 27dM-PHE     | C <sub>16</sub> H <sub>14</sub>   | 206                      | 3               | 145     | 351     | 1.63 x10 <sup>-2</sup>    |
| Phenanthrene, 1,6-dimethyl-        | 16dM-PHE     | C <sub>16</sub> H <sub>14</sub>   | 206                      | 3               | 109     | 351     | 1.63 x10 <sup>-2</sup>    |
| Phenanthrene, 1,7-dimethyl-        | 17dM-PHE     | C <sub>16</sub> H <sub>14</sub>   | 206                      | 3               | 109     | 351     | 1.63 x10 <sup>-2</sup>    |
| Phenanthrene, 1,2-dimethyl-        | 12dM-PHE     | C <sub>16</sub> H <sub>14</sub>   | 206                      | 3               | 109     | 351     | 1.63 x10 <sup>-2</sup>    |

| Compound                             | Abbreviation | Formula                         | Molecular Weight [g/mol] | Number of Rings | Mp [°C] | Bp [°C] | Ps@25°C [Pa] <sup>1</sup> |
|--------------------------------------|--------------|---------------------------------|--------------------------|-----------------|---------|---------|---------------------------|
| Anthracene, 9,10-dimethyl-           | 910dM-AN     | C <sub>16</sub> H <sub>14</sub> | 206                      | 3               | 183     | 351     | 1.63 x10 <sup>-2</sup>    |
| Phenanthrene, 9-n-propyl-            | 9P-PHE       | C <sub>17</sub> H <sub>16</sub> | 220                      | 3               | 112     | 363     | 8.59 x10 <sup>-3</sup>    |
| Phenanthrene, 1,2,6-trimethyl-       | 126tM-PHE    | C <sub>17</sub> H <sub>16</sub> | 220                      | 3               | NA      | NA      | NA                        |
| Phenanthrene, 1,9-dimethyl-7-ethyl-  | 19dM-7E-PHE  | C <sub>18</sub> H <sub>18</sub> | 234                      | 3               | NA      | NA      | NA                        |
| Phenanthrene, 1,9-dimethyl-5-ethyl - | 19dM-5E-PHE  | C <sub>18</sub> H <sub>18</sub> | 234                      | 3               | NA      | NA      | NA                        |
| Phenanthrene, 1,2,6,9-tetramethyl-   | 1269teM-PHE  | C <sub>18</sub> H <sub>18</sub> | 234                      | 3               | NA      | NA      | NA                        |
| <b>C1-C4 FLT/PY:</b>                 |              |                                 |                          |                 |         |         |                           |
| Fluoranthene, 2-methyl-              | 2M-FLT       | C <sub>17</sub> H <sub>12</sub> | 216                      | 4               | 132     | 383     | 2.79 x10 <sup>-3</sup>    |
| Fluoranthene, 8-methyl-              | 8M-FLT       | C <sub>17</sub> H <sub>12</sub> | 216                      | 4               | 132     | 383     | 2.79 x10 <sup>-3</sup>    |
| Fluoranthene, 7-methyl-              | 7M-FLT       | C <sub>17</sub> H <sub>12</sub> | 216                      | 4               | 132     | 383     | 2.79 x10 <sup>-3</sup>    |
| Fluoranthene, 1-methyl-              | 1M-FLT       | C <sub>17</sub> H <sub>12</sub> | 216                      | 4               | 132     | 383     | 2.79 x10 <sup>-3</sup>    |
| Fluoranthene, 3-methyl-              | 3M-FLT       | C <sub>17</sub> H <sub>12</sub> | 216                      | 4               | 105     | 333     | 4.35 x10 <sup>-2</sup>    |
| Pyrene, 2-methyl-                    | 2M-PY        | C <sub>17</sub> H <sub>12</sub> | 216                      | 4               | 132     | 383     | 2.79 x10 <sup>-3</sup>    |
| Pyrene, 4-methyl-                    | 4M-PY        | C <sub>17</sub> H <sub>12</sub> | 216                      | 4               | 132     | 383     | 2.79 x10 <sup>-3</sup>    |
| Pyrene, 1-methyl-                    | 1M-PY        | C <sub>17</sub> H <sub>12</sub> | 216                      | 4               | 132     | 383     | 2.79 x10 <sup>-3</sup>    |
| Fluoranthene, 3-ethyl-               | 3E-FLT       | C <sub>18</sub> H <sub>14</sub> | 230                      | 4               | 141     | 395     | 1.47 x10 <sup>-3</sup>    |
| Pyrene, 4,5-dimethyl-                | 45dM-PY      | C <sub>18</sub> H <sub>14</sub> | 230                      | 4               | NA      | NA      | NA                        |
| Pyrene, 1-n-propyl-                  | 1P-PY        | C <sub>19</sub> H <sub>16</sub> | 244                      | 4               | 149     | 407     | 7.63 x10 <sup>-4</sup>    |
| Pyrene, 1-n-butyl-                   | 1B-PY        | C <sub>20</sub> H <sub>18</sub> | 258                      | 4               | 157     | 418     | 3.97 x10 <sup>-4</sup>    |
| <b>C1-C4 BTC:</b>                    |              |                                 |                          |                 |         |         |                           |
| Chrysene, 2-methyl-                  | 2M-CHRY      | C <sub>19</sub> H <sub>14</sub> | 242                      | 4               | 148     | 411     | 6.05 x10 <sup>-4</sup>    |
| Chrysene, 4-methyl-                  | 4M-CHRY      | C <sub>19</sub> H <sub>14</sub> | 242                      | 4               | 256     | 411     | 6.05 x10 <sup>-4</sup>    |
| Chrysene, 1-methyl-                  | 1M-CHRY      | C <sub>19</sub> H <sub>14</sub> | 242                      | 4               | 256     | 411     | 6.05 x10 <sup>-4</sup>    |
| Triphenylene, 2-methyl-              | 2M-TRI       | C <sub>19</sub> H <sub>14</sub> | 242                      | 4               | 148     | 411     | 6.05 x10 <sup>-4</sup>    |
| Benz[a]anthracene, 6,8-dimethyl-     | 68dM-BaA     | C <sub>20</sub> H <sub>16</sub> | 256                      | 4               | 154     | 422     | 3.15 x10 <sup>-4</sup>    |
| Benz[a]anthracene, 3,9-dimethyl-     | 39dM-BaA     | C <sub>20</sub> H <sub>16</sub> | 256                      | 4               | 154     | 422     | 3.15 x10 <sup>-4</sup>    |
| Benz[a]anthracene, 7,12-dimethyl-    | 712dM-BaA    | C <sub>20</sub> H <sub>16</sub> | 256                      | 4               | 122     | 422     | 3.15 x10 <sup>-4</sup>    |
| Chrysene, 6-n-propyl-                | 6P-CHRY      | C <sub>21</sub> H <sub>18</sub> | 270                      | 4               | NA      | NA      | NA                        |
| Chrysene, 1,3,6-trimethyl-           | 136tM-CHRY   | C <sub>21</sub> H <sub>18</sub> | 270                      | 4               | NA      | NA      | NA                        |
| Chrysene, 6-n-butyl-                 | 6B-CHRY      | C <sub>22</sub> H <sub>20</sub> | 284                      | 4               | NA      | NA      | NA                        |

<sup>1</sup>Values from Chemspider (<http://www.chemspider.com>, 2015), calculated with US Environmental Protection Agency's EPISuite™; NA – not available.

**Table S2.** PACs grouping.

| Group Name                | PACs                                     |
|---------------------------|------------------------------------------|
| Unsubstituted PAHs:       |                                          |
| VOL (Volatile PAHs)       | AL, AE, FL, PHE, AN                      |
| SVOL (Semi-volatile PAHs) | FLT, PY, B[a]A, CHRY                     |
| PM (Particle-bound PAHs)  | B[b]FLT, B[k]FLT, B[a]P, D[ah]A, B[ghi]P |
| Alkylated PAHs and DBTs:  |                                          |

|                    |                              |
|--------------------|------------------------------|
| G1 (VOL-alk-PAHs)  | C1–C4 NAP, C1–C4 FL, DBT     |
| G2 (SVOL-alk-PAHs) | RET, C1–C4 DBT, C1–C4 PHE/AN |
| G3 (PM-alk-PAHs)   | C1–C4 FLT/PY, C1–C4 BTC      |

**Table S3.** Method performance parameters.

| Compound                           | IDL<br>[ng/μL] | MDL<br>[ng/m <sup>3</sup> ] | Recovery<br>[%] |
|------------------------------------|----------------|-----------------------------|-----------------|
| Acenaphthylene                     | 0.0005         | 0.002                       | 74              |
| Acenaphthene                       | 0.0002         | 0.007                       | 76              |
| Fluorene                           | 0.0002         | 0.010                       | 79              |
| Anthracene                         | 0.001          | 0.003                       | 77              |
| Phenanthrene                       | 0.0008         | 0.015                       | 87              |
| 2-Methylfluorene                   | 0.001          | 0.009                       | 89              |
| Pyrene                             | 0.0005         | 0.008                       | 94              |
| Fluoranthene                       | 0.0004         | 0.004                       | 94              |
| Benzo[a]fluorene                   | 0.0007         | 0.002                       | 94              |
| 1-Methylpyrene                     | 0.0005         | 0.003                       | 94              |
| Benzo[b]fluorene                   | 0.0006         | 0.002                       | 94              |
| Benzo[g,h,i]fluoranthene           | 0.0009         | 0.002                       | 94              |
| Benz[a]anthracene                  | 0.001          | 0.003                       | 108             |
| Triphenylene                       | 0.0008         | 0.003                       | 91              |
| Chrysene                           | 0.0009         | 0.003                       | 92              |
| 7-Methylbenz[a]anthracene          | 0.002          | 0.002                       | 94              |
| Benzo[b]fluoranthene               | 0.002          | 0.002                       | 101             |
| Perylene                           | 0.003          | 0.003                       | 94              |
| Benzo[k]fluoranthene               | 0.003          | 0.003                       | 99              |
| Benzo[e]pyrene                     | 0.002          | 0.002                       | 99              |
| Benzo[a]pyrene                     | 0.003          | 0.003                       | 98              |
| 3-Methylcholanthrene               | 0.005          | 0.007                       | 98              |
| Indeno[1,2,3-cd]fluoranthene       | 0.003          | 0.003                       | 98              |
| Anthanthrene                       | 0.004          | 0.009                       | 98              |
| Indeno[1,2,3-cd]pyrene             | 0.003          | 0.005                       | 107             |
| Benzo[g,h,i]perylene               | 0.002          | 0.003                       | 103             |
| Benzo[b]chrysene                   | 0.004          | 0.004                       | 103             |
| Dibenz[a,h]anthracene              | 0.003          | 0.003                       | 107             |
| <b>C1–C4 NAP:</b>                  |                |                             |                 |
| Naphthalene, 2-methyl-             | 0.0002         | 0.051                       | 70              |
| Naphthalene, 1-methyl-             | 0.0002         | 0.031                       | 70              |
| Naphthalene, 2-ethyl-              | 0.001          | 0.008                       | 70              |
| Naphthalene, 1-ethyl-              | 0.001          | 0.004                       | 70              |
| Naphthalene, 2,6-dimethyl-         | 0.001          | 0.018                       | 70              |
| Naphthalene, 2,7-dimethyl-         | 0.001          | 0.018                       | 70              |
| Naphthalene, 1,7-dimethyl-         | 0.001          | 0.009                       | 70              |
| Naphthalene, 1,3-dimethyl-         | 0.001          | 0.011                       | 70              |
| Naphthalene, 1,6-dimethyl-         | 0.001          | 0.012                       | 70              |
| Naphthalene, 1,4-dimethyl-         | 0.001          | 0.003                       | 70              |
| Naphthalene, 1,5-dimethyl-         | 0.001          | 0.01                        | 70              |
| Naphthalene, 2,3-dimethyl-         | 0.001          | 0.01                        | 70              |
| Naphthalene, 1,2-dimethyl-         | 0.001          | 0.006                       | 70              |
| Naphthalene, 1,8-dimethyl-         | 0.001          | 0.002                       | 70              |
| Naphthalene, 2-ethyl-6-methyl-     | 0.001          | 0.009                       | 70              |
| Naphthalene, 1,2,6-trimethyl-      | 0.001          | 0.005                       | 70              |
| Naphthalene, 7-isopropyl-1-methyl- | 0.0005         | 0.002                       | 70              |
| Naphthalene, 1,2,5,6-tetramethyl-  | 0.0005         | 0.003                       | 70              |

| Compound                             | IDL<br>[ng/μL] | MDL<br>[ng/m <sup>3</sup> ] | Recovery<br>[%] |
|--------------------------------------|----------------|-----------------------------|-----------------|
| <b>C1-C4 FL:</b>                     |                |                             |                 |
| Fluorene, 9-methyl-                  | 0.001          | 0.003                       | 79              |
| Fluorene, 3-methyl-                  | 0.001          | 0.003                       | 79              |
| Fluorene, 2-methyl-                  | 0.001          | 0.005                       | 79              |
| Fluorene, 1-methyl-                  | 0.001          | 0.004                       | 79              |
| Fluorene, 4-methyl-                  | 0.001          | 0.003                       | 79              |
| Fluorene, 9-ethyl-                   | 0.001          | 0.002                       | 79              |
| Fluorene, 1,7-dimethyl-              | 0.001          | 0.004                       | 79              |
| Fluorene, 9-n-propyl-                | 0.002          | 0.002                       | 79              |
| Fluorene, 9-n-butyl-                 | 0.002          | 0.002                       | 79              |
| <b>DBT:</b>                          |                |                             |                 |
| Dibenzothiophene                     | 0.002          | 0.002                       | 64              |
| <b>C1-C4 DBT:</b>                    |                |                             |                 |
| Dibenzothiophene, 4-methyl-          | 0.001          | 0.002                       | 64              |
| Dibenzothiophene, 2-methyl-          | 0.001          | 0.000                       | 64              |
| Dibenzothiophene, 3-methyl-          | 0.001          | 0.001                       | 64              |
| Dibenzothiophene, 1-methyl-          | 0.001          | 0.001                       | 64              |
| Dibenzothiophene, 4,6-dimethyl-      | 0.001          | 0.002                       | 64              |
| Dibenzothiophene, 2,6-dimethyl-      | 0.001          | 0.001                       | 64              |
| Dibenzothiophene, 2,8-dimethyl-      | 0.001          | 0.001                       | 64              |
| Dibenzothiophene, 1,8-dimethyl-      | 0.001          | 0.002                       | 64              |
| Dibenzothiophene, 2,3-dimethyl-      | 0.002          | 0.002                       | 64              |
| Dibenzothiophene, 2,4,7-trimethyl-   | 0.002          | 0.002                       | 64              |
| Dibenzothiophene, 2,3,7-trimethyl-   | 0.002          | 0.002                       | 64              |
| Dibenzothiophene, 2,3,8-trimethyl-   | 0.002          | 0.002                       | 64              |
| Dibenzothiophene, 4,6-diethyl-       | 0.0005         | 0.001                       | 64              |
| Dibenzothiophene, 2-n-butyl-         | 0.001          | 0.001                       | 64              |
| <b>C1-C4 PHE/ANT:</b>                |                |                             |                 |
| Phenanthrene, 3-methyl-              | 0.001          | 0.007                       | 87              |
| Phenanthrene, 2-methyl-              | 0.001          | 0.006                       | 87              |
| Anthracene, 2-methyl-                | 0.002          | 0.003                       | 87              |
| Phenanthrene, 4-methyl-              | 0.001          | 0.003                       | 87              |
| Phenanthrene, 9-methyl               | 0.002          | 0.006                       | 87              |
| Anthracene, 1-methyl                 | 0.002          | 0.006                       | 87              |
| Phenanthrene, 1-methyl-              | 0.001          | 0.005                       | 87              |
| Anthracene, 9-methyl-                | 0.001          | 0.003                       | 87              |
| Phenanthrene, 2,7-dimethyl-          | 0.005          | 0.005                       | 87              |
| Phenanthrene, 1,6-dimethyl-          | 0.002          | 0.004                       | 87              |
| Phenanthrene, 1,7-dimethyl-          | 0.005          | 0.005                       | 87              |
| Phenanthrene, 1,2-dimethyl-          | 0.002          | 0.002                       | 87              |
| Anthracene, 9,10-dimethyl-           | 0.002          | 0.002                       | 87              |
| Phenanthrene, 9-n-propyl-            | 0.001          | 0.002                       | 87              |
| Phenanthrene, 1,2,6-trimethyl-       | 0.001          | 0.003                       | 87              |
| Retene                               | 0.001          | 0.016                       | 94              |
| Phenanthrene, 1,9-dimethyl-7-ethyl-  | 0.002          | 0.003                       | 87              |
| Phenanthrene, 1,9-dimethyl-5-ethyl - | 0.002          | 0.002                       | 87              |
| Phenanthrene, 1,2,6,9-tetramethyl-   | 0.002          | 0.003                       | 87              |
| <b>C1-C4 FLT/PY:</b>                 |                |                             |                 |
| Fluoranthene, 2-methyl-              | 0.0005         | 0.005                       | 94              |
| Fluoranthene, 8-methyl-              | 0.0005         | 0.005                       | 94              |
| Fluoranthene, 7-methyl-              | 0.0005         | 0.003                       | 94              |
| Fluoranthene, 1-methyl-              | 0.0005         | 0.002                       | 94              |

| Compound                          | IDL<br>[ng/ $\mu$ L] | MDL<br>[ng/m <sup>3</sup> ] | Recovery<br>[%] |
|-----------------------------------|----------------------|-----------------------------|-----------------|
| Fluoranthene, 3-methyl-           | 0.001                | 0.002                       | 94              |
| Pyrene, 2-methyl-                 | 0.001                | 0.002                       | 94              |
| Pyrene, 4-methyl-                 | 0.001                | 0.002                       | 94              |
| Pyrene, 1-methyl-                 | 0.001                | 0.002                       | 94              |
| Fluoranthene, 3-ethyl-            | 0.001                | 0.003                       | 94              |
| Pyrene, 4,5-dimethyl-             | 0.001                | 0.002                       | 94              |
| Pyrene, 1-n-propyl-               | 0.001                | 0.002                       | 94              |
| Pyrene, 1-n-butyl-                | 0.002                | 0.003                       | 94              |
| <b>C1-C4 BTC:</b>                 |                      |                             |                 |
| Chrysene, 2-methyl-               | 0.001                | 0.003                       | 94              |
| Chrysene, 4-methyl-               | 0.001                | 0.003                       | 94              |
| Chrysene, 1-methyl-               | 0.001                | 0.002                       | 94              |
| Triphenylene, 2-methyl-           | 0.001                | 0.003                       | 97              |
| Benz[a]anthracene, 6,8-dimethyl-  | 0.002                | 0.002                       | 99              |
| Benz[a]anthracene, 3,9-dimethyl-  | 0.002                | 0.002                       | 99              |
| Benz[a]anthracene, 7,12-dimethyl- | 0.005                | 0.005                       | 99              |
| Chrysene, 6-n-propyl-             | 0.002                | 0.002                       | 94              |
| Chrysene, 1,3,6-trimethyl-        | 0.005                | 0.005                       | 94              |
| Chrysene, 6-n-butyl-              | 0.005                | 0.005                       | 94              |

**Table S4.** Total (GP + PM) PAC concentrations (ng/m<sup>3</sup>) measured at the Montréal site during the study period (2015-2016).

| Compound <sup>a</sup> | Min  | Max  | Mean<br>± SD | Median |
|-----------------------|------|------|--------------|--------|
| 4,AL                  | 0.02 | 5.2  | 0.76±1.1     | 0.27   |
| AE                    | 0.14 | 4.8  | 0.93±0.91    | 0.56   |
| FL                    | 0.28 | 5.2  | 1.8±1.3      | 1.4    |
| AN                    | 0.05 | 1.9  | 0.24±0.32    | 0.14   |
| PHE                   | 0.96 | 12   | 4.6±2.8      | 3.7    |
| MFL                   | 0.06 | 2.3  | 0.53±0.46    | 0.37   |
| PY                    | 0.18 | 3.8  | 0.78±0.67    | 0.62   |
| FLT                   | 0.27 | 5.4  | 1.2±0.89     | 0.98   |
| B[a]FL                | 0.01 | 0.25 | 0.04±0.05    | 0.02   |
| MPY                   | 0.01 | 0.16 | 0.03±0.03    | 0.02   |
| B[b]FL                | 0.01 | 0.19 | 0.03±0.04    | 0.02   |
| B[ghi]FL              | 0.02 | 0.51 | 0.09±0.11    | 0.05   |
| B[a]A                 | 0.01 | 0.45 | 0.07±0.08    | 0.03   |
| TRI                   | 0.01 | 0.19 | 0.05±0.04    | 0.04   |
| CHRY                  | 0.03 | 0.73 | 0.15±0.16    | 0.07   |
| RET                   | 0.07 | 1.4  | 0.37±0.27    | 0.29   |
| MB[a]A                | <MDL | 0.01 | <MDL         | <MDL   |
| B[b]FLT               | 0.02 | 0.96 | 0.17±0.20    | 0.09   |
| PER                   | <MDL | 0.22 | 0.01±0.03    | 0.005  |
| B[k]FLT               | 0.01 | 0.31 | 0.05±0.06    | 0.03   |
| B[e]P                 | <MDL | 0.48 | 0.07±0.08    | 0.04   |
| B[a]P                 | 0.01 | 0.50 | 0.06±0.09    | 0.02   |
| MCH                   | <MDL | 0.04 | <MDL         | <MDL   |
| IF                    | <MDL | 0.05 | <MDL         | <MDL   |
| ANT                   | <MDL | 0.60 | 0.03±0.09    | <MDL   |
| IP                    | 0.01 | 0.48 | 0.08±0.09    | 0.06   |
| B[ghi]P               | <MDL | 0.66 | 0.08±0.10    | 0.05   |



| Compound <sup>a</sup> | Min  | Max  | Mean<br>± SD | Median |
|-----------------------|------|------|--------------|--------|
| B[b]C                 | <MDL | 0.05 | <MDL         | <MDL   |
| D[ah]A                | <MDL | 0.58 | 0.3±0.09     | <MDL   |
| C1-NAP                | 0.19 | 13   | 2.6±2.9      | 1.4    |
| C2-NAP                | 0.31 | 17   | 3.3±3.5      | 2.0    |
| C3-NAP                | 0.65 | 17   | 3.8±3.3      | 2.9    |
| C4-NAP                | 0.27 | 9.6  | 2.2±1.7      | 1.6    |
| C1-FL                 | 0.16 | 4.8  | 1.2±0.98     | 0.94   |
| C2-FL                 | 0.13 | 4.4  | 1.5±0.97     | 1.3    |
| C3-FL                 | 0.14 | 7.9  | 2.7±1.9      | 2.5    |
| C4-FL                 | 0.04 | 1.8  | 0.69±0.48    | 0.69   |
| DBT                   | 0.01 | 0.63 | 0.16±0.16    | 0.10   |
| C1-DBT                | 0.01 | 1.1  | 0.21±0.24    | 0.10   |
| C2-DBT                | 0.01 | 1.5  | 0.29±0.32    | 0.15   |
| C3-DBT                | 0.01 | 0.90 | 0.17±0.19    | 0.09   |
| C4-DBT                | <MDL | 0.36 | 0.07±0.08    | 0.04   |
| C1-PHE/AN             | 0.14 | 3.9  | 1.4±0.90     | 1.2    |
| C2-PHE/AN             | 0.06 | 2.2  | 0.99±0.67    | 0.93   |
| C3-PHE/AN             | 0.03 | 1.4  | 0.44±0.31    | 0.40   |
| C4-PHE/AN             | 0.04 | 0.99 | 0.27±0.18    | 0.24   |
| C1-FLT/PY             | 0.05 | 1.3  | 0.22±0.23    | 0.15   |
| C2-FLT/PY             | 0.03 | 1.1  | 0.16±0.20    | 0.10   |
| C3-FLT/PY             | 0.02 | 1.2  | 0.12±0.19    | 0.07   |
| C4-FLT/PY             | <MDL | 0.52 | 0.05±0.07    | 0.03   |
| C1-BTC                | 0.03 | 0.79 | 0.10±0.13    | 0.06   |
| C2-BTC                | 0.01 | 0.59 | 0.06±0.09    | 0.04   |
| C3-BTC                | 0.01 | 0.05 | 0.07±0.08    | 0.05   |
| C4-BTC                | 0.01 | 0.68 | 0.06±0.10    | 0.04   |

<MDL – below MDL; <sup>a</sup>PAHs and alk-PAHs sorted with increasing molecular weight; <sup>b</sup>values below MDL were replaced by (½ × MDL) for reporting purposes; (N=54).

**Table S5.** Total (GP + PM) PAC concentrations (ng/m<sup>3</sup>) measured at the Toronto site during the study period (2015–2016).

| Compound <sup>a</sup> | Min  | Max  | Mean<br>± SD | Median |
|-----------------------|------|------|--------------|--------|
| AL                    | 0.06 | 10   | 0.92±1.5     | 0.51   |
| AE                    | 0.30 | 6.7  | 2.1±1.5      | 1.7    |
| FL                    | 1.4  | 13   | 4.3±2.5      | 3.4    |
| AN                    | 0.19 | 1.9  | 0.72±0.37    | 0.66   |
| PHE                   | 3.2  | 39   | 11±7.7       | 8.6    |
| MFL                   | 0.53 | 4.1  | 1.5±0.76     | 1.3    |
| PY                    | 0.77 | 4.1  | 1.9±0.78     | 1.7    |
| FLT                   | 0.83 | 7.1  | 2.6±1.4      | 2.2    |
| B[a]FL                | 0.03 | 0.25 | 0.07±0.03    | 0.06   |
| MPY                   | 0.08 | 0.78 | 0.16±0.09    | 0.14   |
| B[b]FL                | 0.02 | 0.16 | 0.04±0.02    | 0.03   |
| B[ghi]FL              | 0.08 | 0.78 | 0.16±0.09    | 0.14   |
| B[a]A                 | 0.04 | 0.74 | 0.13±0.09    | 0.11   |
| TRI                   | 0.04 | 0.29 | 0.08±0.03    | 0.07   |
| CHRY                  | 0.07 | 0.96 | 0.20±0.12    | 0.17   |
| RET                   | 0.18 | 1.4  | 0.51±0.26    | 0.46   |
| MB[a]A                | <MDL | <MDL | <MDL         | <MDL   |
| B[b]FLT               | 0.06 | 1.2  | 0.23±0.15    | 0.21   |
| PER                   | <MDL | 0.14 | 0.02±0.02    | 0.02   |
| B[k]FLT               | 0.02 | 0.44 | 0.08±0.06    | 0.07   |
| B[e]P                 | 0.04 | 0.71 | 0.15±0.09    | 0.14   |
| B[a]P                 | 0.03 | 0.71 | 0.11±0.09    | 0.09   |
| MCH                   | <MDL | <MDL | <MDL         | <MDL   |
| IF                    | <MDL | 0.07 | <MDL         | <MDL   |
| ANT                   | <MDL | 0.16 | 0.03±0.02    | 0.02   |
| IP                    | 0.04 | 0.79 | 0.15±0.10    | 0.15   |
| B[ghi]P               | 0.07 | 1.1  | 0.23±0.14    | 0.19   |
| B[b]C                 | <MDL | 0.04 | <MDL         | <MDL   |
| D[ah]A                | <MDL | 0.08 | 0.02±0.01    | 0.01   |
| C1-NAP                | 0.08 | 26   | 3.8±4.2      | 2.7    |
| C2-NAP                | 0.05 | 30   | 6.3±5.7      | 5.1    |
| C3-NAP                | 0.04 | 47   | 10±8.7       | 8.6    |
| C4-NAP                | 0.03 | 23   | 8.7±4.5      | 8.0    |
| C1-FL                 | 0.01 | 11   | 4.0±2.2      | 3.5    |
| C2-FL                 | 0.04 | 16   | 6.2±3.8      | 5.7    |
| C3-FL                 | 0.12 | 40   | 11±8.3       | 10     |
| C4-FL                 | 0.04 | 12   | 3.3±2.5      | 2.8    |
| DBT                   | 0.01 | 1.7  | 0.47±0.39    | 0.42   |
| C1-DBT                | 0.01 | 1.4  | 0.40±0.32    | 0.36   |
| C2-DBT                | 0.01 | 2.1  | 0.62±0.49    | 0.53   |
| C3-DBT                | 0.01 | 1.3  | 0.41±0.31    | 0.31   |
| C4-DBT                | 0.01 | 0.69 | 0.20±0.15    | 0.16   |
| C1-PHE/AN             | 0.05 | 8.1  | 3.5±1.8      | 3.3    |
| C2-PHE/AN             | 0.05 | 6.4  | 2.7±1.4      | 2.4    |
| C3-PHE/AN             | 0.04 | 3.6  | 1.5±0.80     | 1.4    |
| C4-PHE/AN             | 0.03 | 1.5  | 0.71±0.33    | 0.67   |
| C1-FLT/PY             | 0.01 | 1.5  | 0.52±0.23    | 0.49   |
| C2-FLT/PY             | 0.02 | 1.3  | 0.49±0.21    | 0.49   |
| C3-FLT/PY             | 0.03 | 1.2  | 0.47±0.20    | 0.48   |
| C4-FLT/PY             | 0.02 | 0.61 | 0.26±0.11    | 0.23   |

| Compound <sup>a</sup> | Min  | Max  | Mean<br>± SD | Median |
|-----------------------|------|------|--------------|--------|
| C1-BTC                | 0.02 | 0.72 | 0.27±0.11    | 0.26   |
| C2-BTC                | 0.01 | 0.47 | 0.28±0.11    | 0.28   |
| C3-BTC                | 0.02 | 0.69 | 0.38±0.15    | 0.38   |
| C4-BTC                | 0.01 | 0.69 | 0.37±0.16    | 0.37   |

<MDL – below MDL; <sup>a</sup>PAHs and alk-PAHs sorted with increasing molecular weight; values below MDL were replaced by ( $\frac{1}{2} \times \text{MDL}$ ) for reporting purposes; (N=52).

**Table S6.** Total (GP + PM) PAC concentrations (ng/m<sup>3</sup>) measured at the Hamilton site during the study period (2015-2016).

|           | Min   | Max   | Mean<br>± SD | Median |
|-----------|-------|-------|--------------|--------|
| AL        | 0.02  | 7.6   | 1.2±1.9      | 0.33   |
| AE        | 0.15  | 4.6   | 1.2±1.0      | 0.93   |
| FL        | 0.79  | 28    | 3.9±4.8      | 1.9    |
| AN        | 0.05  | 8.8   | 0.81±1.3     | 0.28   |
| PHE       | 1.51  | 70    | 12±13        | 9.1    |
| MFL       | 0.25  | 3.5   | 0.89±0.66    | 0.68   |
| PY        | 0.31  | 16    | 2.7±3.3      | 1.3    |
| FLT       | 0.48  | 31    | 4.5±5.6      | 2.5    |
| B[a]FL    | 0.01  | 1.9   | 0.22±0.35    | 0.06   |
| MPY       | 0.01  | 0.41  | 0.06±0.07    | 0.04   |
| B[b]FL    | 0.01  | 1.6   | 0.16±0.28    | 0.03   |
| B[ghi]FL  | 0.016 | 1.1   | 0.19±0.23    | 0.09   |
| B[a]A     | 0.021 | 2.7   | 0.38±0.54    | 0.11   |
| TRI       | 0.024 | 1.6   | 0.18±0.24    | 0.08   |
| CHRY      | 0.037 | 5.2   | 0.63±0.93    | 0.22   |
| RET       | 0.067 | 1.2   | 0.34±0.24    | 0.29   |
| MB[a]A    | <MDL  | 0.006 | <MDL         | <MDL   |
| B[b]FLT   | 0.030 | 7.5   | 0.08±1.3     | 0.28   |
| PER       | <MDL  | 0.67  | 0.09±0.13    | 0.029  |
| B[k]FLT   | 0.012 | 2.2   | 0.27±0.40    | 0.09   |
| B[e]P     | <MDL  | 3.7   | 0.41±0.67    | 0.13   |
| B[a]P     | 0.011 | 2.4   | 0.31±0.44    | 0.11   |
| MCH       | <MDL  | 0.084 | <MDL         | <MDL   |
| IF        | <MDL  | 0.15  | 0.02±0.03    | 0.01   |
| ANT       | <MDL  | 0.82  | 0.08±0.14    | 0.02   |
| IP        | <MDL  | 3.8   | 0.43±0.69    | 0.14   |
| B[ghi]P   | <MDL  | 3.3   | 0.39±0.61    | 0.14   |
| B[b]C     | <MDL  | 0.21  | 0.03±0.04    | 0.01   |
| D[ah]A    | <MDL  | 0.79  | 0.08±0.14    | 0.03   |
| C1-NAP    | 0.21  | 27    | 2.9±3.9      | 1.8    |
| C2-NAP    | 0.66  | 21    | 3.6±3.3      | 2.8    |
| C3-NAP    | 1.6   | 22    | 5.5±3.6      | 4.6    |
| C4-NAP    | 1.5   | 12    | 4.6±2.1      | 4.1    |
| C1-FL     | 0.77  | 7.5   | 2.1±1.3      | 1.8    |
| C2-FL     | 0.68  | 6.7   | 2.5±1.3      | 2.4    |
| C3-FL     | 0.91  | 15    | 4.7±3.0      | 4.3    |
| C4-FL     | 0.19  | 5.6   | 1.3±1.0      | 1.2    |
| DBT       | 0.01  | 1.9   | 0.42±0.42    | 0.28   |
| C1-DBT    | <MDL  | 2.3   | 0.34±0.37    | 0.25   |
| C2-DBT    | <MDL  | 5.4   | 0.48±0.76    | 0.36   |
| C3-DBT    | <MDL  | 6.9   | 0.34±0.95    | 0.19   |
| C4-DBT    | <MDL  | 5.7   | 0.20±0.78    | 0.08   |
| C1-PHE/AN | 0.43  | 13    | 2.9±2.5      | 2.5    |
| C2-PHE/AN | 0.21  | 7.4   | 1.9±1.6      | 1.6    |
| C3-PHE/AN | 0.09  | 10    | 1.0±1.4      | 0.78   |

|           | Min  | Max | Mean<br>± SD | Median |
|-----------|------|-----|--------------|--------|
| C4-PHE/AN | 0.06 | 5.8 | 0.49±0.79    | 0.36   |
| C1-FLT/PY | 0.07 | 3.7 | 0.61±0.72    | 0.29   |
| C2-FLT/PY | 0.04 | 3.9 | 0.53±0.78    | 0.23   |
| C3-FLT/PY | 0.05 | 5.2 | 0.39±0.76    | 0.14   |
| C4-FLT/PY | 0.02 | 1.9 | 0.17±0.28    | 0.07   |
| C1-BTC    | 0.05 | 2.2 | 0.37±0.47    | 0.14   |
| C2-BTC    | 0.02 | 2.2 | 0.21±0.34    | 0.08   |
| C3-BTC    | 0.02 | 2.1 | 0.21±0.31    | 0.10   |
| C4-BTC    | 0.13 | 8.4 | 0.98±1.4     | 0.41   |

<MDL – below MDL; <sup>a</sup> PAHs and alk-PAHs sorted with increasing molecular weight; <sup>b</sup> values below MDL were replaced by ( $\frac{1}{2} \times \text{MDL}$ ) for reporting purposes; (N=52).

**Table S7.** Total (GP + PM) PAC concentrations (ng/m<sup>3</sup>) measured at the Simcoe site during the study period (2015–2016).

| Compound <sup>a</sup> | Min  | Max  | Mean<br>± SD | Median |
|-----------------------|------|------|--------------|--------|
| AL                    | 0.01 | 2.1  | 0.14±0.30    | 0.06   |
| AE                    | 0.03 | 0.85 | 0.26±0.19    | 0.23   |
| FL                    | 0.25 | 3.9  | 1.3±0.79     | 1.2    |
| AN                    | 0.02 | 1.1  | 0.23±0.26    | 0.09   |
| PHE                   | 0.46 | 20   | 3.3±3.6      | 2.1    |
| MFL                   | 0.05 | 1.2  | 0.45±0.35    | 0.24   |
| PY                    | 0.08 | 5.3  | 0.51±0.76    | 0.34   |
| FLT                   | 0.14 | 8.5  | 0.79±1.2     | 0.54   |
| B[a]FL                | 0.01 | 0.36 | 0.03±0.05    | 0.02   |
| MPY                   | 0.01 | 0.12 | 0.03±0.03    | 0.02   |
| B[b]FL                | 0.01 | 0.25 | 0.02±0.03    | 0.01   |
| B[ghi]FL              | 0.01 | 0.35 | 0.04±0.05    | 0.02   |
| B[a]A                 | 0.01 | 0.64 | 0.04±0.08    | 0.02   |
| TRI                   | 0.01 | 0.31 | 0.04±0.04    | 0.03   |
| CHRY                  | 0.02 | 1.0  | 0.09±0.14    | 0.06   |
| RET                   | 0.06 | 1.6  | 0.35±0.27    | 0.27   |
| MB[a]A                | <MDL | 0.01 | <MDL         | <MDL   |
| B[b]FLT               | 0.01 | 1.3  | 0.10±0.17    | 0.06   |
| PER                   | <MDL | 0.12 | 0.01±0.02    | <MDL   |
| B[k]FLT               | <MDL | 0.40 | 0.03±0.06    | 0.02   |
| B[e]P                 | <MDL | 0.64 | 0.05±0.09    | 0.03   |
| B[a]P                 | <MDL | 0.43 | 0.04±0.06    | 0.02   |
| MCH                   | <MDL | 0.01 | <MDL         | <MDL   |
| IF                    | <MDL | 0.04 | <MDL         | <MDL   |
| ANT                   | <MDL | 0.16 | 0.01±0.03    | <MDL   |
| IP                    | <MDL | 0.68 | 0.05±0.09    | 0.03   |
| B[ghi]P               | <MDL | 0.62 | 0.05±0.09    | 0.03   |
| B[b]C                 | <MDL | 0.06 | <MDL         | <MDL   |
| D[ah]A                | <MDL | 0.13 | 0.01±0.02    | <MDL   |
| C1-NAP                | 0.16 | 4.1  | 0.99±0.75    | 0.86   |
| C2-NAP                | 0.27 | 5.6  | 1.4±0.99     | 1.3    |
| C3-NAP                | 0.49 | 8.6  | 2.4±1.8      | 1.7    |
| C4-NAP                | 0.39 | 7.1  | 2.1±1.8      | 1.3    |
| C1-FL                 | 0.23 | 3.0  | 1.1±0.78     | 0.89   |
| C2-FL                 | 0.18 | 5.1  | 1.7±1.5      | 0.84   |

| Compound <sup>a</sup> | Min  | Max  | Mean<br>± SD | Median |
|-----------------------|------|------|--------------|--------|
| C3-FL                 | 0.27 | 12   | 3.9±3.9      | 1.6    |
| C4-FL                 | 0.07 | 4.4  | 1.2±1.3      | 0.48   |
| DBT                   | 0.01 | 0.99 | 0.13±0.18    | 0.08   |
| C1-DBT                | <MDL | 0.91 | 0.13±0.17    | 0.05   |
| C2-DBT                | <MDL | 1.3  | 0.24±0.28    | 0.10   |
| C3-DBT                | 0.01 | 0.89 | 0.13±0.17    | 0.06   |
| C4-DBT                | <MDL | 0.38 | 0.06±0.08    | 0.02   |
| C1-PHE/AN             | 0.14 | 4.9  | 1.3±1.2      | 0.71   |
| C2-PHE/AN             | 0.07 | 3.8  | 1.1±1.1      | 0.54   |
| C3-PHE/AN             | 0.03 | 2.0  | 0.58±0.59    | 0.29   |
| C4-PHE/AN             | 0.04 | 0.83 | 0.31±0.21    | 0.24   |
| C1-FLT/PY             | 0.03 | 0.86 | 0.19±0.16    | 0.13   |
| C2-FLT/PY             | 0.02 | 0.71 | 0.16±0.15    | 0.09   |
| C3-FLT/PY             | 0.01 | 0.49 | 0.09±0.08    | 0.07   |
| C4-FLT/PY             | <MDL | 0.20 | 0.03±0.03    | 0.03   |
| C1-BTC                | 0.02 | 0.41 | 0.06±0.05    | 0.05   |
| C2-BTC                | 0.01 | 0.22 | 0.03±0.03    | 0.03   |
| C3-BTC                | 0.01 | 0.22 | 0.04±0.03    | 0.03   |
| C4-BTC                | 0.01 | 0.23 | 0.03±0.03    | 0.02   |

<MDL—below MDL <sup>a</sup> PAHs and alk-PAHs sorted with increasing molecular weight;  
<sup>b</sup> values below MDL were replaced by ( $\frac{1}{2} \times \text{MDL}$ ) for reporting purposes; (N=54).

**Table S8.** Total (GP + PM) PAC concentrations (ng/m<sup>3</sup>) measured at the Edmonton site during the study period (2015-2016).

| Compound <sup>a</sup> | Min               | Max  | Mean<br>± SD | Median |
|-----------------------|-------------------|------|--------------|--------|
| AL                    | 0.02              | 3.3  | 0.69±0.79    | 0.39   |
| AE                    | 0.04              | 1.4  | 0.44±0.29    | 0.35   |
| FL                    | 0.26              | 3.1  | 1.1±0.58     | 0.93   |
| AN                    | 0.04              | 0.34 | 0.13±0.07    | 0.11   |
| PHE                   | 0.82              | 5.2  | 2.4±1.2      | 1.9    |
| MFL                   | 0.12              | 1.4  | 0.40±0.25    | 0.32   |
| PY                    | 0.16              | 1.3  | 0.52±0.28    | 0.43   |
| FLT                   | 0.19              | 1.3  | 0.55±0.29    | 0.42   |
| B[a]FL                | 0.01              | 0.06 | 0.02±0.02    | 0.02   |
| MPY                   | 0.01              | 0.06 | 0.02±0.14    | 0.02   |
| B[b]FL                | <MDL <sup>b</sup> | 0.04 | 0.01±0.01    | 0.01   |
| B[ghi]FL              | 0.01              | 0.23 | 0.07±0.05    | 0.05   |
| B[a]A                 | 0.01              | 0.17 | 0.04±0.03    | 0.03   |
| TRI                   | <MDL              | 0.14 | 0.04±0.03    | 0.03   |
| CHRY                  | 0.01              | 0.42 | 0.090±0.08   | 0.06   |
| RET                   | 0.12              | 6.0  | 0.80±1.1     | 0.45   |
| MB[a]A                | <MDL              | <MDL | <MDL         | <MDL   |
| B[b]FLT               | 0.01              | 1.3  | 0.10±0.18    | 0.06   |
| PER                   | <MDL              | <MDL | <MDL         | <MDL   |
| B[k]FLT               | <MDL              | 0.12 | 0.03±0.03    | 0.02   |
| B[e]P                 | <MDL              | 0.19 | 0.06±0.05    | 0.04   |
| B[a]P                 | <MDL              | 0.08 | 0.02±0.02    | 0.02   |
| MCH                   | <MDL              | <MDL | <MDL         | <MDL   |
| IF                    | <MDL              | 0.02 | 0.01±0.01    | <MDL   |
| ANT                   | <MDL              | 0.02 | 0.01±0.01    | <MDL   |
| IP                    | <MDL              | 0.24 | 0.06±0.05    | 0.04   |
| B[ghi]P               | <MDL              | 0.28 | 0.08±0.06    | 0.06   |
| B[b]C                 | <MDL              | 0.01 | <MDL         | <MDL   |
| D[ah]A                | <MDL              | 0.02 | <MDL         | <MDL   |
| C1-NAP                | 0.22              | 21   | 3.3±4.1      | 1.9    |
| C2-NAP                | 0.27              | 19   | 3.5±3.7      | 2.4    |
| C3-NAP                | 0.46              | 15   | 4.4±3.4      | 3.1    |
| C4-NAP                | 0.51              | 6.8  | 2.3±1.4      | 1.9    |
| C1-FL                 | 0.28              | 2.7  | 0.94±0.54    | 0.83   |
| C2-FL                 | 0.41              | 2.7  | 1.2±0.63     | 1.1    |
| C3-FL                 | 0.80              | 6.3  | 2.4±1.3      | 2.1    |
| C4-FL                 | 0.19              | 1.6  | 0.69±0.35    | 0.64   |
| DBT                   | 0.01              | 0.48 | 0.09±0.09    | 0.06   |
| C1-DBT                | 0.01              | 1.2  | 0.17±0.24    | 0.08   |
| C2-DBT                | 0.03              | 1.3  | 0.20±0.26    | 0.10   |
| C3-DBT                | 0.02              | 0.69 | 0.12±0.13    | 0.07   |
| C4-DBT                | 0.01              | 0.31 | 0.06±0.06    | 0.04   |
| C1-PHE/AN             | 0.29              | 2.6  | 0.96±0.60    | 0.78   |
| C2-PHE/AN             | 0.21              | 2.4  | 0.85±0.56    | 0.71   |
| C3-PHE/AN             | 0.09              | 1.4  | 0.550±0.34   | 0.43   |
| C4-PHE/AN             | 0.07              | 2.3  | 0.45±0.44    | 0.29   |
| C1-FLT/PY             | 0.05              | 0.36 | 0.14±0.08    | 0.11   |
| C2-FLT/PY             | 0.05              | 0.39 | 0.15±0.08    | 0.12   |
| C3-FLT/PY             | 0.04              | 0.36 | 0.15±0.08    | 0.12   |
| C4-FLT/PY             | 0.01              | 0.19 | 0.07±0.05    | 0.06   |

| Compound <sup>a</sup> | Min  | Max  | Mean<br>± SD | Median |
|-----------------------|------|------|--------------|--------|
| C1-BTC                | 0.02 | 0.30 | 0.09±0.06    | 0.07   |
| C2-BTC                | 0.02 | 0.22 | 0.08±0.05    | 0.07   |
| C3-BTC                | 0.02 | 0.27 | 0.09±0.05    | 0.08   |
| C4-BTC                | 0.01 | 0.30 | 0.08±0.05    | 0.08   |

<MDL—below MDL; <sup>a</sup> PAHs and alk-PAHs sorted with increasing molecular weight; <sup>b</sup> values below MDL were replaced by ( $\frac{1}{2} \times \text{MDL}$ ) for reporting purposes; (N=50).

**Table S9.** Total (GP + PM) PAC concentrations (ng/m<sup>3</sup>) measured at the AMS 11 site during the study period (2015-2016) (Wnorowski et al., 2021).

| Compound <sup>a</sup> | Min  | Max  | Mean<br>± SD | Median |
|-----------------------|------|------|--------------|--------|
| AL                    | 0.01 | 8.5  | 0.39±1.3     | 0.06   |
| AE                    | 0.06 | 2.9  | 0.79±0.66    | 0.57   |
| FL                    | 0.17 | 7.7  | 1.0±1.1      | 0.73   |
| AN                    | 0.02 | 2.7  | 0.57±0.61    | 0.33   |
| PHE                   | 0.65 | 20   | 3.7±3.2      | 2.8    |
| MFL                   | 0.15 | 3.9  | 0.98±0.64    | 0.84   |
| PY                    | 0.13 | 6.8  | 1.2±1.4      | 0.68   |
| FLT                   | 0.08 | 1.9  | 0.46±0.44    | 0.32   |
| B[a]FL                | 0.01 | 1.8  | 0.25±0.38    | 0.10   |
| MPY                   | 0.01 | 1.9  | 0.28±0.39    | 0.12   |
| B[b]FL                | <MDL | 0.83 | 0.10±0.16    | 0.04   |
| B[ghi]FL              | 0.01 | 0.49 | 0.07±0.11    | 0.02   |
| B[a]A                 | 0.02 | 9.1  | 1.2±1.9      | 0.35   |
| TRI                   | <MDL | 3.4  | 0.23±0.51    | 0.08   |
| CHRY                  | 0.01 | 9.5  | 1.1±1.7      | 0.43   |
| RET                   | 0.08 | 88   | 4.3±17.      | 0.39   |
| MB[a]A                | <MDL | 0.08 | <MDL         | <MDL   |
| B[b]FLT               | <MDL | 3.8  | 0.49±0.75    | 0.14   |
| PER                   | <MDL | 0.80 | 0.11±0.18    | 0.04   |
| B[k]FLT               | <MDL | 1.1  | 0.13±0.20    | 0.04   |
| B[e]P                 | 0.01 | 8.6  | 1.1±1.8      | 0.36   |
| B[a]P                 | 0.01 | 9.8  | 1.2±2.1      | 0.34   |
| MCH                   | <MDL | 0.34 | 0.03±0.06    | 0.02   |
| IF                    | 0.01 | 0.07 | 0.02±0.01    | 0.02   |
| ANT                   | 0.01 | 0.83 | 0.10±0.18    | 0.03   |
| IP                    | <MDL | 2.3  | 0.29±0.48    | 0.08   |
| B[ghi]P               | 0.01 | 7.9  | 1.0±1.7      | 0.28   |
| B[b]C                 | 0.01 | 3.5  | 0.42±0.74    | 0.11   |
| D[ah]A                | <MDL | 3.4  | 0.42±0.73    | 0.10   |
| C1-NAP                | 0.16 | 44   | 4.4±8.8      | 1.7    |
| C2-NAP                | 0.41 | 58   | 6.6±8.9      | 3.9    |
| C3-NAP                | 1.5  | 59   | 12±10        | 11     |
| C4-NAP                | 2.6  | 35   | 12±8.0       | 10     |
| C1-FL                 | 0.59 | 14   | 3.3±2.2      | 2.8    |
| C2-FL                 | 1.0  | 19   | 5.8±3.4      | 5.2    |
| C3-FL                 | 2.1  | 34   | 12±7.9       | 11     |
| C4-FL                 | 0.49 | 9.3  | 3.5±2.2      | 3.1    |
| DBT                   | 0.07 | 4.4  | 1.1±1.0      | 0.77   |
| C1-DBT                | 0.22 | 15   | 3.3±3.3      | 2.2    |
| C2-DBT                | 0.36 | 26   | 5.2±5.6      | 3.5    |
| C3-DBT                | 0.25 | 22   | 3.9±4.7      | 2.3    |



| Compound <sup>a</sup> | Min  | Max | Mean<br>± SD | Median |
|-----------------------|------|-----|--------------|--------|
| C4-DBT                | 0.15 | 11  | 2.1±2.5      | 1.3    |
| C1-PHE/AN             | 0.62 | 21  | 5.4±4.4      | 3.8    |
| C2-PHE/AN             | 0.75 | 23  | 5.8±5.1      | 4.1    |
| C3-PHE/AN             | 0.57 | 15  | 3.8±3.6      | 2.6    |
| C4-PHE/AN             | 0.28 | 33  | 3.3±6.4      | 1.6    |
| C1-FLT/PY             | 0.08 | 13  | 1.8±2.8      | 0.69   |
| C2-FLT/PY             | 0.08 | 28  | 4.1±6.3      | 1.3    |
| C3-FLT/PY             | 0.08 | 45  | 6.2±9.9      | 1.8    |
| C4-FLT/PY             | 0.01 | 32  | 4.3±6.8      | 1.3    |
| C1-BTC                | 0.02 | 53  | 7.1±11       | 2.1    |
| C2-BTC                | 0.01 | 43  | 6.0±9.7      | 1.7    |
| C3-BTC                | 0.01 | 29  | 4.0±6.3      | 1.2    |
| C4-BTC                | 0.01 | 19  | 2.8±4.4      | 0.98   |

<MDL—below MDL; <sup>a</sup> PAHs and alk-PAHs sorted with increasing molecular weight;  
<sup>b</sup> values below MDL were replaced by (½ x MDL) for reporting purposes; (N=54).

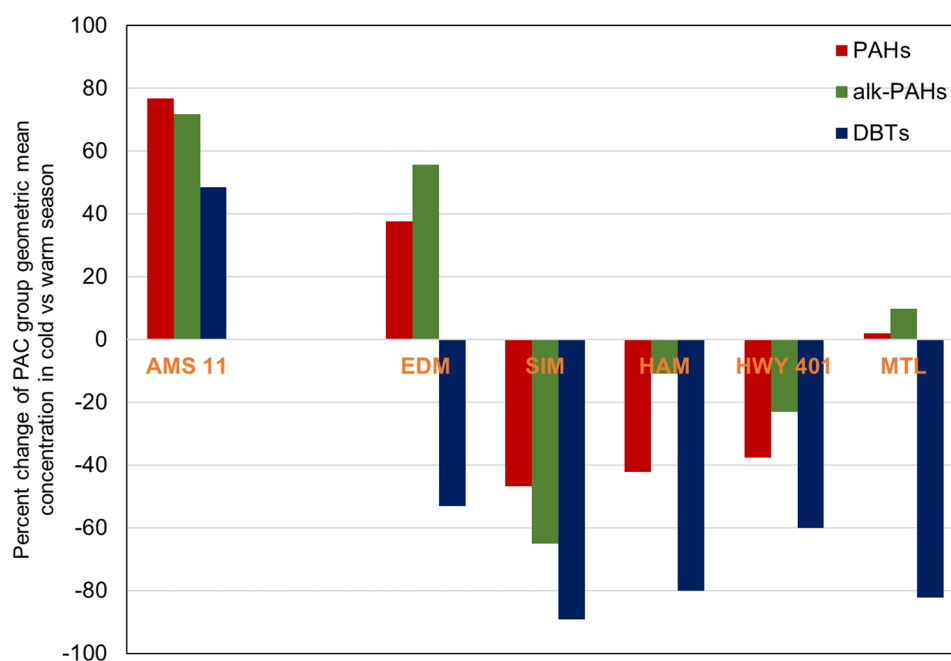

**Figure S1.** Unsubstituted PAH, alk-PAH and DBT concentration changes at cold (October-March) versus warm (April-September) season by site for 2015-2016 period. Note, the data for the AMS11 site is reported for comparison [2].

## References

1. Wnorowski, A., Tardif M., Harnish D., Poole G. & Chiu C.H.. Correction of analytical results for recovery: Determination of PAHs in ambient air, soil, and diesel emission control samples by isotope dilution gas chromatography-mass spectrometry, *Polycyclic Aromatic Compounds*, 2006, 26, 313–329, DOI: 10.1080/10406630601028171.
2. Wnorowski, A., Aklilu, Y. A., Harner, T., Schuster, J., & Charland, J. P. Polycyclic aromatic compounds in ambient air in the surface minable area of Athabasca oil sands in Alberta (Canada). *Atmos. Environ.* 2021, 244, 117897..
